# Supplementary material for: Shotgun Proteomics Revealed Preferential Degradation of Misfolded In Vivo Obligate GroE Substrates by Lon Protease in Escherichia coli
Source: MDPI journal article supplement (doi:10.3390/molecules27123772), 2022-06-11
Supplement: s1 [file s1]

**Supplementary materials of**  
**Shotgun proteomics revealed preferential degradation of**  
**misfolded *in vivo* obligate GroE substrates by Lon protease in**  
***Escherichia coli*.**

**Tatsuya Niwa, Yuhei Chadani, and Hideki Taguchi\***

Cell Biology Center, Institute of Innovative Research, Tokyo Institute of Technology,  
Yokohama 226-8503, Japan

This document contains the following information:

- Supplementary Figure S1: Additional data of proteome analysis of MGM100 and MGM100-derived strains.
- Supplementary Figure S2: Additional data of proteome analysis of  $\Delta dnaKJ$  and  $\Delta dnaKJ\Delta lon$  strains.
- Supplementary Table S1: Abundance changes of known Lon substrates in MGM100 and MGM100 $\Delta lon$  strains.
- Supplementary Table S2: *E. coli* strains used in this study.
- Supplementary Table S3: Parameters for the SWATH acquisition.

Supplementary datasets are available as separated excel files:

- Supplementary Dataset S1 : Proteome data for the MGM100 and MGM100-derived strains.
- Supplementary Dataset S2 : Proteome data for the  $\Delta dnaKJ$  and  $\Delta dnaKJ\Delta lon$  strains.
- Supplementary Dataset S3 : List of proteins with cluster numbers.
- Supplementary Dataset S4 : List of proteins up- or down-regulated by the Lon deletion.

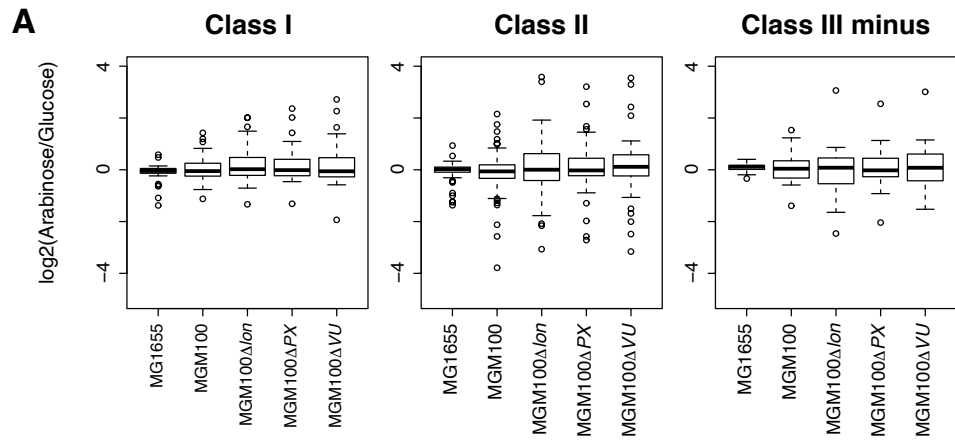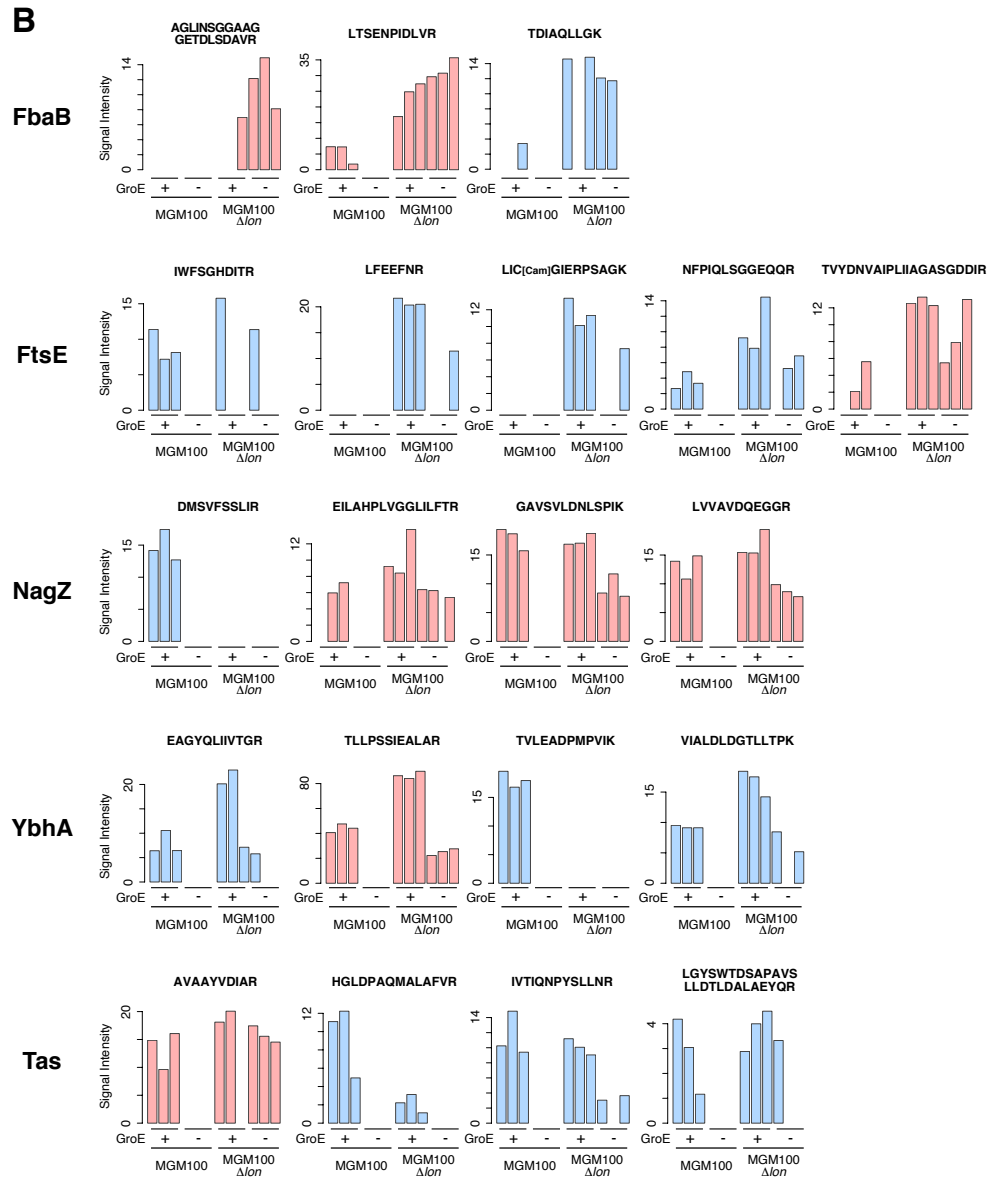

**Supplementary Figure S1. Additional data of proteome analysis of MGM100 and its derivative strains.**

(A) Distribution of the foldchanges of GroE Class I, II, and III minus substrates represented as boxplots (by R software). The center bar in the box represents the median, and the upper and lower portion of the box represent 75% and 25% quantile, respectively. The numbers of the evaluated substrates were ~36 for Class I, ~77 for Class II, and ~29 for Class III minus.

(B) Intensities of the peptides corresponding to the five proteins identified in the GroE-normal cells but not in the GroE-depleted cells in the MGM100 strain (see Table 1). Only the intensities of MGM100 and MGM100 $\Delta lon$  strains were shown. The graphs depicted in red indicate the peptides whose intensities under the GroE depletion condition in MGM100 $\Delta lon$  were detected in all three technical replicates, *i.e.* the peptides assumed to be present under this condition.

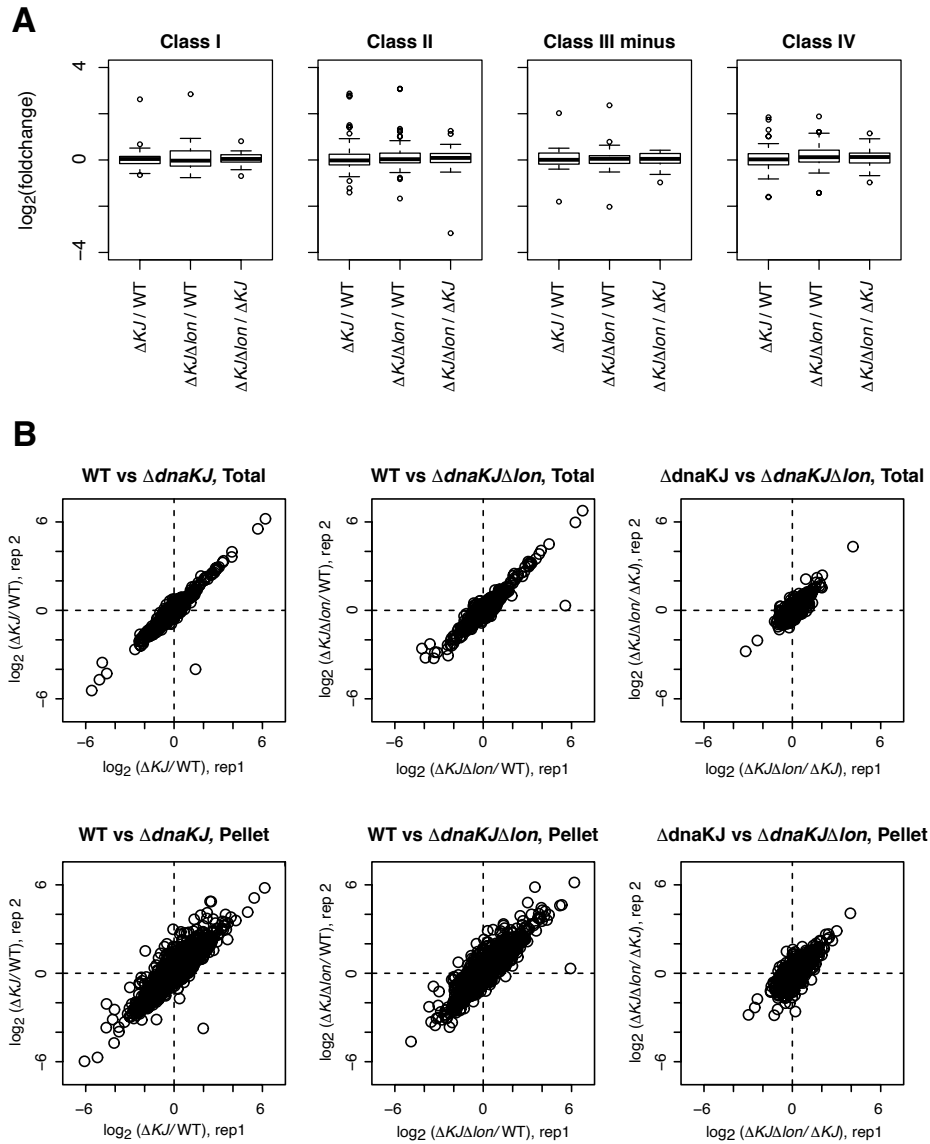

**Supplementary Figure S2. Additional data of proteome analysis of  $\Delta dnaKJ$  and  $\Delta dnaKJ\Delta lon$  strains.**

(A) Distribution of the foldchanges of GroE Class I, II, III minus, and IV substrates represented as boxplots (by R software). The center bar in the box represents the median, and the upper and lower portion of the box represent 75% and 25% quantile, respectively. The numbers of the evaluated substrates were ~35 for Class I, ~81 for Class II, ~28 for Class III minus, and ~38 for Class IV.

(B) Reproducibility of the proteome changes by the DnaK/DnaJ deletion. Upper panels showed the reproducibility of the fold changes between two biological replicates in the total fraction, and lower panels showed those in the pellet fraction.

**Supplementary Table S1. Abundance changes of known Lon substrates in MGM100 and MGM100 $\Delta$ lon strains.**

| Protein Name                          | Gene name          | Reference                                     | Number of Detection MGM100 Ara | Number of Detection MGM100 Glc | Number of Detection MGM100 $\Delta$ lon Ara | Number of Detection MGM100 $\Delta$ lon Glc | Foldchange Glc/Ara, in MGM100 | Foldchange Glc/Ara, in MGM100 $\Delta$ lon | Foldchange MGM100 $\Delta$ lon / MGM100, Ara | Foldchange MGM100 $\Delta$ lon / MGM100, Glc |
|---------------------------------------|--------------------|-----------------------------------------------|--------------------------------|--------------------------------|---------------------------------------------|---------------------------------------------|-------------------------------|--------------------------------------------|----------------------------------------------|----------------------------------------------|
| SulA                                  | <i>sulA</i>        | <i>Proc. Natl. Acad. Sci. U S A.</i> 1983 [1] | 0                              | 0                              | 0                                           | 0                                           | (N. D.)                       | (N. D.)                                    | (N. D.)                                      | (N. D.)                                      |
| RcsA                                  | <i>rcsA</i>        | <i>J. Bacteriol.</i> 1991 [2]                 | 0                              | 0                              | 0                                           | 3                                           | (N. D.)                       | (N. D.)                                    | (N. D.)                                      | (N. D.)                                      |
| $\lambda$ Xis                         | <i>xis</i>         | <i>J. Bacteriol.</i> 1998 [3]                 | 0                              | 0                              | 0                                           | 0                                           | (N. D.)                       | (N. D.)                                    | (N. D.)                                      | (N. D.)                                      |
| Homoserine succinyl transferase (HTS) | <i>metA</i>        | <i>Mol. Microbiol.</i> 2000 [4]               | 1                              | 3                              | 2                                           | 3                                           | (N. D.)                       | (N. D.)                                    | (N. D.)                                      | <b>2.96</b>                                  |
| SoxS                                  | <i>soxS</i>        | <i>Mol. Microbiol.</i> 2004 [5]               | 0                              | 0                              | 0                                           | 0                                           | (N. D.)                       | (N. D.)                                    | (N. D.)                                      | (N. D.)                                      |
| MarA                                  | <i>marA</i>        |                                               | 0                              | 0                              | 3                                           | 3                                           | (N. D.)                       | <b>1.39</b>                                | (N. D.)                                      | (N. D.)                                      |
| RecA                                  | <i>recA</i>        | <i>Mol. Cell.</i> 2006 [6]                    | 3                              | 3                              | 3                                           | 3                                           | <b>1.15</b>                   | <b>0.98</b>                                | <b>1.54</b>                                  | <b>1.32</b>                                  |
| RuvB                                  | <i>ruvB</i>        |                                               | 3                              | 3                              | 3                                           | 3                                           | <b>0.84</b>                   | <b>1.34</b>                                | <b>1.48</b>                                  | <b>2.36</b>                                  |
| IbpA                                  | <i>ibpA</i>        | <i>Mol. Microbiol.</i> 2010 [7]               | 3                              | 3                              | 3                                           | 3                                           | <b>2.51</b>                   | <b>2.59</b>                                | <b>1.81</b>                                  | <b>1.86</b>                                  |
| IbpB                                  | <i>ibpB</i>        |                                               | 3                              | 3                              | 3                                           | 3                                           | <b>1.62</b>                   | <b>2.65</b>                                | <b>1.3</b>                                   | <b>2.13</b>                                  |
| CspD                                  | <i>cspD</i>        | <i>Mol. Microbiol.</i> 2011 [8]               | 3                              | 3                              | 3                                           | 3                                           | <b>0.69</b>                   | <b>0.4</b>                                 | <b>1.03</b>                                  | <b>0.59</b>                                  |
| FdoH                                  | <i>fdoH</i>        | <i>J. Biol. Chem.</i> 2012 [9]                | 3                              | 3                              | 3                                           | 2                                           | <b>0.62</b>                   | (N. D.)                                    | <b>0.78</b>                                  | (N. D.)                                      |
| MetR                                  | <i>metR</i>        | <i>Proteomics.</i> 2018 [10]                  | 1                              | 3                              | 0                                           | 3                                           | (N. D.)                       | (N. D.)                                    | (N. D.)                                      | <b>1.27</b>                                  |
| CysB                                  | <i>cysB</i>        |                                               | 3                              | 3                              | 3                                           | 3                                           | <b>0.95</b>                   | <b>1.47</b>                                | <b>0.98</b>                                  | <b>1.52</b>                                  |
| PuuB                                  | <i>puuB</i>        |                                               | 0                              | 0                              | 0                                           | 0                                           | (N. D.)                       | (N. D.)                                    | (N. D.)                                      | (N. D.)                                      |
| YceA                                  | <i>yceA</i>        |                                               | 3                              | 3                              | 3                                           | 3                                           | <b>0.87</b>                   | (N. D.)                                    | <b>0.64</b>                                  | (N. D.)                                      |
| FrsA                                  | <i>frsA</i>        |                                               | 3                              | 3                              | 3                                           | 3                                           | <b>1.29</b>                   | <b>1.06</b>                                | <b>1.57</b>                                  | <b>1.29</b>                                  |
| TldD                                  | <i>tldD</i>        |                                               | 3                              | 1                              | 3                                           | 1                                           | (N. D.)                       | (N. D.)                                    | <b>1.68</b>                                  | (N. D.)                                      |
| <b>LipA*</b>                          | <b><i>lipA</i></b> |                                               | 3                              | 3                              | 3                                           | 3                                           | <b>0.18</b>                   | <b>0.41</b>                                | <b>1.23</b>                                  | <b>2.85</b>                                  |
| SrlD                                  | <i>srlD</i>        |                                               | 3                              | 0                              | 3                                           | 0                                           | (N. D.)                       | (N. D.)                                    | <b>3.77</b>                                  | (N. D.)                                      |
| YghW                                  | <i>yghW</i>        |                                               | 0                              | 0                              | 0                                           | 0                                           | (N. D.)                       | (N. D.)                                    | (N. D.)                                      | (N. D.)                                      |
| NuoB                                  | <i>nuoB</i>        |                                               | 3                              | 2                              | 3                                           | 3                                           | (N. D.)                       | <b>0.16</b>                                | <b>0.85</b>                                  | (N. D.)                                      |
| FlgE                                  | <i>flgE</i>        |                                               | 3                              | 0                              | 3                                           | 0                                           | (N. D.)                       | (N. D.)                                    | <b>0.73</b>                                  | (N. D.)                                      |
| ProV                                  | <i>proV</i>        |                                               | 3                              | 3                              | 3                                           | 3                                           | <b>1.17</b>                   | <b>0.71</b>                                | <b>0.91</b>                                  | <b>0.55</b>                                  |
| YrdA                                  | <i>yrdA</i>        |                                               | 3                              | 3                              | 3                                           | 3                                           | <b>1.47</b>                   | <b>1.14</b>                                | <b>1.08</b>                                  | <b>0.84</b>                                  |
| InaA                                  | <i>inaA</i>        |                                               | 0                              | 0                              | 3                                           | 3                                           | (N. D.)                       | <b>0.71</b>                                | (N. D.)                                      | (N. D.)                                      |

\* *In vivo* obligate GroE substrate

**Supplementary Table S2. *E. coli* strains used in this study.**

| Strain                            | Description                                                                                                                                                 | Source                         |
|-----------------------------------|-------------------------------------------------------------------------------------------------------------------------------------------------------------|--------------------------------|
| BW25113                           | F <sup>-</sup> , λ <sup>-</sup> , Δ( <i>araD-araB</i> )567, Δ <i>lacZ</i> 4787(:: <i>rrnB</i> -3), <i>rph</i> -1, Δ( <i>rhaD-rhaB</i> )568, <i>hsdR</i> 514 | Laboratory stock               |
| JW0013-KC                         | BW25113 Δ <i>dnaK</i> ::FRT-Km <sup>r</sup> -FRT                                                                                                            | Baba <i>et al.</i> , 2006 [11] |
| JW0014-KC                         | BW25113 Δ <i>dnaJ</i> ::FRT-Km <sup>r</sup> -FRT                                                                                                            |                                |
| JW0427-KC                         | BW25113 Δ <i>clpP</i> ::FRT-Km <sup>r</sup> -FRT                                                                                                            |                                |
| JW0428-KC                         | BW25113 Δ <i>clpX</i> ::FRT-Km <sup>r</sup> -FRT                                                                                                            |                                |
| JW0429-KC                         | BW25113 Δ <i>lon</i> ::FRT-Km <sup>r</sup> -FRT                                                                                                             |                                |
| JW3902-KC                         | BW25113 Δ <i>hslU</i> ::FRT-Km <sup>r</sup> -FRT                                                                                                            |                                |
| JW3903-KC                         | BW25113 Δ <i>hslV</i> ::FRT-Km <sup>r</sup> -FRT                                                                                                            |                                |
| ECY210                            | BW25113 Δ <i>lon</i> ::FRT-Cm <sup>r</sup> -FRT                                                                                                             | This study                     |
| ECY262                            | BW25113 Δ <i>dnaKJ</i> ::FRT-Km <sup>r</sup> -FRT                                                                                                           |                                |
| ECY289                            | BW25113 Δ <i>hslUV</i> ::FRT-Km <sup>r</sup> -FRT                                                                                                           |                                |
| ECY290                            | BW25113 Δ <i>clpXP</i> ::FRT-Km <sup>r</sup> -FRT                                                                                                           |                                |
| ECY292                            | BW25113 Δ <i>hslUV</i> ::FRT-Cm <sup>r</sup> -FRT                                                                                                           |                                |
| ECY293                            | BW25113 Δ <i>clpXP</i> ::FRT-Cm <sup>r</sup> -FRT                                                                                                           |                                |
| MGM100                            | F <sup>-</sup> , λ <sup>-</sup> , <i>rph</i> -1, <i>araBADp-groE</i> , <i>zje</i> -2335::kan                                                                | McLennan & Masters, 1999 [12]  |
| MGM100Δ <i>lon</i>                | MGM100 Δ <i>lon</i> ::FRT-Cm <sup>r</sup> -FRT                                                                                                              | This study                     |
| MGM100Δ <i>clpXP</i>              | MGM100 Δ <i>clpXP</i> ::FRT-Cm <sup>r</sup> -FRT                                                                                                            |                                |
| MGM100Δ <i>hslUV</i>              | MGM100 Δ <i>hslUV</i> ::FRT-Cm <sup>r</sup> -FRT                                                                                                            |                                |
| MG1655                            | F <sup>-</sup> , λ <sup>-</sup> , <i>ilvG</i> <sup>-</sup> , <i>rfb</i> -50, <i>rph</i> -1                                                                  | Laboratory stock               |
| MG1655Δ <i>dnaKJ</i>              | MG1655 Δ <i>dnaKJ</i> ::FRT-Km <sup>r</sup> -FRT                                                                                                            | This study                     |
| MG1655Δ <i>dnaKJ</i> Δ <i>lon</i> | MG1655 Δ <i>dnaKJ</i> ::FRT-Km <sup>r</sup> -FRT, Δ <i>lon</i> ::FRT-Cm <sup>r</sup> -FRT                                                                   |                                |

**Supplementary Table S3. Parameters for SWATH acquisition.**

|                                                                                            | TripleTOF 4600                                                                                                                                                                                                                                                                                                                                                                                                                                                                                                                                               | TripleTOF 6600                                                                                                                                                                                                                                                                                                                                                                                                                                                                                                                                               |
|--------------------------------------------------------------------------------------------|--------------------------------------------------------------------------------------------------------------------------------------------------------------------------------------------------------------------------------------------------------------------------------------------------------------------------------------------------------------------------------------------------------------------------------------------------------------------------------------------------------------------------------------------------------------|--------------------------------------------------------------------------------------------------------------------------------------------------------------------------------------------------------------------------------------------------------------------------------------------------------------------------------------------------------------------------------------------------------------------------------------------------------------------------------------------------------------------------------------------------------------|
| Acetonitrile gradient<br>(in the presence of<br>0.1 % formic acid)                         | 10 - 40 %, 67 min                                                                                                                                                                                                                                                                                                                                                                                                                                                                                                                                            | 10 - 30 %, 60 min<br>+<br>30 - 40 %, 10 min                                                                                                                                                                                                                                                                                                                                                                                                                                                                                                                  |
| m/z range of MS1                                                                           | 400 - 1250 Da                                                                                                                                                                                                                                                                                                                                                                                                                                                                                                                                                | 350 - 1500 Da                                                                                                                                                                                                                                                                                                                                                                                                                                                                                                                                                |
| Accumulation time<br>for MS1                                                               | 100 msec                                                                                                                                                                                                                                                                                                                                                                                                                                                                                                                                                     | 100 msec                                                                                                                                                                                                                                                                                                                                                                                                                                                                                                                                                     |
| Accumulation time<br>for MS2                                                               | 60 msec                                                                                                                                                                                                                                                                                                                                                                                                                                                                                                                                                      | 45 msec                                                                                                                                                                                                                                                                                                                                                                                                                                                                                                                                                      |
| Number of SWATH<br>window                                                                  | 40                                                                                                                                                                                                                                                                                                                                                                                                                                                                                                                                                           | 50                                                                                                                                                                                                                                                                                                                                                                                                                                                                                                                                                           |
| m/z of<br>SWATH window<br>(variable window<br>optimized for<br><i>E. coli</i> cell lysate) | 399.5 - 424.2<br>423.2 - 445.1<br>444.1 - 462.1<br>461.1 - 477.5<br>476.5 - 491.8<br>490.8 - 505.6<br>504.6 - 518.2<br>517.2 - 530.9<br>529.9 - 543.0<br>542.0 - 553.9<br>552.9 - 564.9<br>563.9 - 575.9<br>574.9 - 585.8<br>584.8 - 596.3<br>595.3 - 606.7<br>605.7 - 616.6<br>615.6 - 627.1<br>626.1 - 637.0<br>636.0 - 646.9<br>645.9 - 657.3<br>656.3 - 667.8<br>666.8 - 678.2<br>677.2 - 688.1<br>687.1 - 699.1<br>698.1 - 709.6<br>708.6 - 720.6<br>719.6 - 732.1<br>731.1 - 744.2<br>743.2 - 756.9<br>755.9 - 770.1<br>769.1 - 784.4<br>783.4 - 800.3 | 349.5 - 378.7<br>377.7 - 405.7<br>404.7 - 425.8<br>424.8 - 441.9<br>440.9 - 456.3<br>455.3 - 470.1<br>469.1 - 482.7<br>481.7 - 494.2<br>493.2 - 505.7<br>504.7 - 516.7<br>515.7 - 527.0<br>526.0 - 537.4<br>536.4 - 547.2<br>546.2 - 556.4<br>555.4 - 565.6<br>564.6 - 574.8<br>573.8 - 583.4<br>582.4 - 592.0<br>591.0 - 600.6<br>599.6 - 609.3<br>608.3 - 617.9<br>616.9 - 627.1<br>626.1 - 635.7<br>634.7 - 644.9<br>643.9 - 654.1<br>653.1 - 663.9<br>662.9 - 674.2<br>673.2 - 684.0<br>683.0 - 694.4<br>693.4 - 705.3<br>704.3 - 716.2<br>715.2 - 728.3 |

|  |               |                 |
|--|---------------|-----------------|
|  | 799.3 - 816.8 | 727.3 - 740.4   |
|  | 815.8 – 835.0 | 739.4 - 753.0   |
|  | 834.0 - 854.8 | 752.0 - 766.2   |
|  | 853.8 - 876.8 | 765.2 - 780.6   |
|  | 875.8 - 901.5 | 779.6 - 796.1   |
|  | 900.5 - 929.6 | 795.1 - 812.2   |
|  | 928.6 - 960.9 | 811.2 - 829.5   |
|  | 959.9 - 999.4 | 828.5 - 847.9   |
|  |               | 846.9 - 867.4   |
|  |               | 866.4 - 887.6   |
|  |               | 886.6 - 908.8   |
|  |               | 907.8 - 932.4   |
|  |               | 931.4 - 958.3   |
|  |               | 957.3 - 987.0   |
|  |               | 986.0 - 1022.1  |
|  |               | 1021.1 - 1070.4 |
|  |               | 1069.4 - 1126.2 |
|  |               | 1125.2 - 1199.8 |



## References

1. Mizusawa, S.; Gottesman, S. Protein Degradation in *Escherichia Coli*: The Lon Gene Controls the Stability of SulA Protein. *Proc Natl Acad Sci U S A* **1983**, *80*, 358–362, doi:10.1073/PNAS.80.2.358.
2. Stout, V.; Torres-Cabassa, A.; Maurizi, M.R.; Gutnick, D.; Gottesman, S. RcsA, an Unstable Positive Regulator of Capsular Polysaccharide Synthesis. *J Bacteriol* **1991**, *173*, 1738–1747, doi:10.1128/JB.173.5.1738-1747.1991.
3. Leffers, J.; Gottesman, S. Lambda Xis Degradation in Vivo by Lon and FtsH. *J Bacteriol* **1998**, *180*, 1573–1577, doi:10.1128/JB.180.6.1573-1577.1998.
4. Biran, D.; Gur, E.; Gollan, L.; Ron, E.Z. Control of Methionine Biosynthesis in *Escherichia Coli* by Proteolysis. *Mol Microbiol* **2000**, *37*, 1436–1443, doi:10.1046/J.1365-2958.2000.02097.X.
5. Griffith, K.L.; Shah, I.M.; Wolf, R.E. Proteolytic Degradation of *Escherichia Coli* Transcription Activators SoxS and MarA as the Mechanism for Reversing the Induction of the Superoxide (SoxRS) and Multiple Antibiotic Resistance (Mar) Regulons. *Mol Microbiol* **2004**, *51*, 1801–1816, doi:10.1046/J.1365-2958.2003.03952.X.
6. Neher, S.B.; Villén, J.; Oakes, E.C.; Bakalarski, C.E.; Sauer, R.T.; Gygi, S.P.; Baker, T.A. Proteomic Profiling of ClpXP Substrates after DNA Damage Reveals Extensive Instability within SOS Regulon. *Mol Cell* **2006**, *22*, 193–204, doi:10.1016/J.MOLCEL.2006.03.007.
7. Bissonnette, S.A.; Rivera-Rivera, I.; Sauer, R.T.; Baker, T.A. The IbpA and IbpB Small Heat-Shock Proteins Are Substrates of the AAA+ Lon Protease. *Mol Microbiol* **2010**, *75*, 1539–1549, doi:10.1111/J.1365-2958.2010.07070.X.
8. Langklotz, S.; Narberhaus, F. The *Escherichia Coli* Replication Inhibitor CspD Is Subject to Growth-Regulated Degradation by the Lon Protease. *Mol Microbiol* **2011**, *80*, 1313–1325, doi:10.1111/J.1365-2958.2011.07646.X.
9. Westphal, K.; Langklotz, S.; Thomanek, N.; Narberhaus, F. A Trapping Approach Reveals Novel Substrates and Physiological Functions of the Essential Protease FtsH in *Escherichia Coli*. *J Biol Chem* **2012**, *287*, 42962–42971, doi:10.1074/JBC.M112.388470.
10. Arends, J.; Griego, M.; Thomanek, N.; Lindemann, C.; Kutscher, B.; Meyer, H.E.; Narberhaus, F. An Integrated Proteomic Approach Uncovers Novel Substrates and Functions of the Lon Protease in *Escherichia Coli*. *Proteomics* **2018**, *18*, doi:10.1002/PMIC.201800080.
11. Baba, T.; Ara, T.; Hasegawa, M.; Takai, Y.; Okumura, Y.; Baba, M.; Datsenko, K.A.; Tomita, M.; Wanner, B.L.; Mori, H. Construction of *Escherichia Coli* K-12 in-Frame, Single-Gene Knockout Mutants: The Keio Collection. *Mol Syst Biol* **2006**, *2*, doi:10.1038/MSB4100050.
12. McLennan, N.; Masters, M. GroE Is Vital for Cell-Wall Synthesis. *Nature* **1998**, *392*, 139, doi:10.1038/32317.
